# Supplementary material for: Serious kidney disease in pregnancy: an Australian national cohort study protocol
Source: Springer Nature journal article supplement (doi:10.1186/s12882-019-1393-z), 2019-06-25
Supplement: MOESM2 [file 16852600]

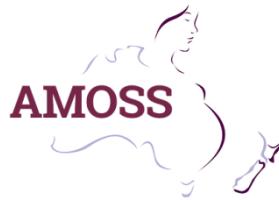

## Case Report Form

# RENAL DISEASE IN PREGNANCY

### Details about the person filling in this form

Name of person completing the form \_\_\_\_\_

Work phone number \_\_\_\_\_

Professional group

- |                                                      |                          |
|------------------------------------------------------|--------------------------|
| Midwife                                              | <input type="checkbox"/> |
| Obstetrician                                         | <input type="checkbox"/> |
| Obstetric physician                                  | <input type="checkbox"/> |
| Maternal-fetal specialist                            | <input type="checkbox"/> |
| AMOSS study coordinator                              | <input type="checkbox"/> |
| Health information manager/Quality assurance officer | <input type="checkbox"/> |
| Anaesthetist                                         | <input type="checkbox"/> |
| Renal physician                                      | <input type="checkbox"/> |
| Renal nurse                                          | <input type="checkbox"/> |
| Physician/District Medical Officer (DMO)             | <input type="checkbox"/> |
| RMO/Registrar                                        | <input type="checkbox"/> |
| GP / GP with Obstetric Diploma                       | <input type="checkbox"/> |
| Remote area nurse (RAN)                              | <input type="checkbox"/> |
| Registered Nurse (other)                             | <input type="checkbox"/> |
| Other – please specify _____                         | <input type="checkbox"/> |

Date data form was completed      □□/□□/□□

Has the Medical Record Number (MRN) been recorded against the AMOSS Case ID in the Log Sheet?

Yes  No  (If no, please do so now. This is to help you easily identify the patient, if AMOSS has any questions about this case in the future.)

### Inclusion criteria

All women in Australia who present with advanced chronic kidney disease or severe acute kidney injury before or during pregnancy.

#### Reporting guidelines

##### **Inclusion:**

If the woman has any of the following:

1. A working kidney transplant (all women regardless of kidney transplant function)      Yes  No
2. Receiving any long-term dialysis before conception and continuing any dialysis during this pregnancy      Yes  No
3. Started any dialysis during this pregnancy (any dialysis - either once off, temporary or permanent dialysis)      Yes  No
4. Known pre-conception eGFR <45ml/min/1.73m<sup>2</sup> (known to have a serum creatinine >130-150 µmol/L BEFORE conception, regardless of the serum creatinine reading during pregnancy; eGFR is reported along with serum creatinine in the biochemistry report)      Yes  No
5. Newly identified kidney impairment with any serum creatinine reading of >150 µmol/L on 2 readings at least 24 hours apart during this pregnancy      Yes  No

Please contact AMOSS [amos@uts.edu.au](mailto:amos@uts.edu.au) or 02 9514 8041 with any queries about inclusion.

## SECTION 1

## SECTION 1: GENERAL RENAL HISTORY

|              |                                                                                                                                                                                           |
|--------------|-------------------------------------------------------------------------------------------------------------------------------------------------------------------------------------------|
| <b>1.</b>    | <b>Did this woman receive care in a maternity service co-located with a renal service?</b><br>Yes <input type="checkbox"/> No <input type="checkbox"/> Not known <input type="checkbox"/> |
| <b>1.1.</b>  | <i>(If yes)</i> Was the primary case medical record shared between these services?<br>Yes <input type="checkbox"/> No <input type="checkbox"/> Not known <input type="checkbox"/>         |
| <b>2.</b>    | <b>Renal History Prior to Pregnancy</b> <i>(where more than one criterion applies, choose all that apply)</i>                                                                             |
| <b>2.1.</b>  | <b>Functioning kidney transplant</b> Yes <input type="checkbox"/> No <input type="checkbox"/>                                                                                             |
| <b>2.2.</b>  | <b>Chronic maintenance dialysis</b> Yes <input type="checkbox"/> No <input type="checkbox"/>                                                                                              |
| <b>2.3.</b>  | <b>Known kidney impairment or kidney disease before this pregnancy</b> Yes <input type="checkbox"/> No <input type="checkbox"/>                                                           |
| <b>2.4.</b>  | <b>No known renal history – kidney impairment was diagnosed for the first time during this pregnancy</b> Yes <input type="checkbox"/> No <input type="checkbox"/>                         |
| <b>3.</b>    | <b>Underlying cause or condition causing kidney disease in this woman</b> <i>(choose all that apply)</i>                                                                                  |
| <b>3.1.</b>  | <b>Glomerulonephritis</b> Yes <input type="checkbox"/> No <input type="checkbox"/>                                                                                                        |
|              | <i>(If yes)</i> Lupus nephritis Yes <input type="checkbox"/> No <input type="checkbox"/>                                                                                                  |
|              | IgA nephropathy Yes <input type="checkbox"/> No <input type="checkbox"/>                                                                                                                  |
|              | Vasculitis Yes <input type="checkbox"/> No <input type="checkbox"/>                                                                                                                       |
|              | Minimal change disease Yes <input type="checkbox"/> No <input type="checkbox"/>                                                                                                           |
|              | Focal Segmental Glomerulosclerosis Yes <input type="checkbox"/> No <input type="checkbox"/>                                                                                               |
|              | Membranous nephritis Yes <input type="checkbox"/> No <input type="checkbox"/>                                                                                                             |
|              | Anti-GBM disease Yes <input type="checkbox"/> No <input type="checkbox"/>                                                                                                                 |
|              | Other glomerulonephritis Yes <input type="checkbox"/> No <input type="checkbox"/>                                                                                                         |
|              | <i>(If yes) specify</i> _____                                                                                                                                                             |
| <b>3.2.</b>  | <b>Reflux nephropathy</b> Yes <input type="checkbox"/> No <input type="checkbox"/>                                                                                                        |
| <b>3.3.</b>  | <b>Genetic disease</b> Yes <input type="checkbox"/> No <input type="checkbox"/>                                                                                                           |
|              | <i>(If yes)</i> Hereditary nephritis (Alport's disease or other) Yes <input type="checkbox"/> No <input type="checkbox"/>                                                                 |
|              | Polycystic kidney disease Yes <input type="checkbox"/> No <input type="checkbox"/>                                                                                                        |
|              | Other genetic disease Yes <input type="checkbox"/> No <input type="checkbox"/>                                                                                                            |
|              | <i>(If yes) specify</i> _____                                                                                                                                                             |
| <b>3.4.</b>  | <b>Congenital renal disease</b> <i>(e.g. congenital renal obstruction, congenital malformation, obstructive uropathy)</i> Yes <input type="checkbox"/> No <input type="checkbox"/>        |
| <b>3.5.</b>  | <b>Diabetic nephropathy</b> Yes <input type="checkbox"/> No <input type="checkbox"/>                                                                                                      |
| <b>3.6.</b>  | <b>Hypertension</b> Yes <input type="checkbox"/> No <input type="checkbox"/>                                                                                                              |
| <b>3.7.</b>  | <b>Kidney stones</b> Yes <input type="checkbox"/> No <input type="checkbox"/>                                                                                                             |
| <b>3.8.</b>  | <b>Interstitial nephritis</b> Yes <input type="checkbox"/> No <input type="checkbox"/>                                                                                                    |
| <b>3.9.</b>  | <b>Obstetric complications during this pregnancy</b> Yes <input type="checkbox"/> No <input type="checkbox"/>                                                                             |
|              | <i>(If yes)</i> Preeclampsia Yes <input type="checkbox"/> No <input type="checkbox"/>                                                                                                     |
|              | Placental abruption Yes <input type="checkbox"/> No <input type="checkbox"/>                                                                                                              |
|              | Hyperemesis gravidarum Yes <input type="checkbox"/> No <input type="checkbox"/>                                                                                                           |
|              | Ovarian hyperstimulation syndrome (OHSS) Yes <input type="checkbox"/> No <input type="checkbox"/>                                                                                         |
|              | Amniotic fluid embolism Yes <input type="checkbox"/> No <input type="checkbox"/>                                                                                                          |
|              | Other Obstetric complications Yes <input type="checkbox"/> No <input type="checkbox"/>                                                                                                    |
|              | <i>(If yes) specify</i> _____                                                                                                                                                             |
| <b>3.10.</b> | <b>Haemolytic uraemic syndrome</b> Yes <input type="checkbox"/> No <input type="checkbox"/>                                                                                               |
| <b>3.11.</b> | <b>Cortical necrosis</b> Yes <input type="checkbox"/> No <input type="checkbox"/>                                                                                                         |
| <b>3.12.</b> | <b>Acute fatty liver of pregnancy</b> Yes <input type="checkbox"/> No <input type="checkbox"/>                                                                                            |

**SECTION 1**

|              |                                                                                                                                     |                                                                                             |
|--------------|-------------------------------------------------------------------------------------------------------------------------------------|---------------------------------------------------------------------------------------------|
| <b>3.13.</b> | <b>Sepsis</b> ( <i>Renal sepsis, Non-renal sepsis, septic shock</i> )                                                               | Yes <input type="checkbox"/> No <input type="checkbox"/>                                    |
|              | ( <i>If yes</i> ) Renal sepsis (inc pyelonephritis, TB, abscess)                                                                    | Yes <input type="checkbox"/> No <input type="checkbox"/>                                    |
|              | Non-renal sepsis (including abortion)                                                                                               | Yes <input type="checkbox"/> No <input type="checkbox"/>                                    |
|              | Sepsis causing septic shock                                                                                                         | Yes <input type="checkbox"/> No <input type="checkbox"/>                                    |
|              | Cause of sepsis _____                                                                                                               |                                                                                             |
| <b>3.14.</b> | <b>Blood loss</b>                                                                                                                   | Yes <input type="checkbox"/> No <input type="checkbox"/>                                    |
|              | ( <i>If yes</i> ) choose all that apply                                                                                             |                                                                                             |
|              | Antepartum haemorrhage                                                                                                              | Yes <input type="checkbox"/> No <input type="checkbox"/>                                    |
|              | Post-partum haemorrhage                                                                                                             | Yes <input type="checkbox"/> No <input type="checkbox"/>                                    |
|              | Gastrointestinal bleed                                                                                                              | Yes <input type="checkbox"/> No <input type="checkbox"/>                                    |
|              | Trauma                                                                                                                              | Yes <input type="checkbox"/> No <input type="checkbox"/>                                    |
|              | Other                                                                                                                               | Yes <input type="checkbox"/> No <input type="checkbox"/>                                    |
|              | ( <i>If yes</i> ) specify _____                                                                                                     |                                                                                             |
| <b>3.15.</b> | <b>Fluid losses</b>                                                                                                                 | Yes <input type="checkbox"/> No <input type="checkbox"/>                                    |
|              | ( <i>If yes</i> ) choose all that apply                                                                                             |                                                                                             |
|              | Vomiting or diarrhoea                                                                                                               | Yes <input type="checkbox"/> No <input type="checkbox"/>                                    |
|              | Polyuria                                                                                                                            | Yes <input type="checkbox"/> No <input type="checkbox"/>                                    |
|              | Nasogastric losses                                                                                                                  | Yes <input type="checkbox"/> No <input type="checkbox"/>                                    |
|              | Other                                                                                                                               | Yes <input type="checkbox"/> No <input type="checkbox"/>                                    |
|              | ( <i>If yes</i> ) specify _____                                                                                                     |                                                                                             |
| <b>3.16.</b> | <b>Poor fluid intake causing dehydration</b>                                                                                        | Yes <input type="checkbox"/> No <input type="checkbox"/>                                    |
| <b>3.17.</b> | <b>Cardiac event</b>                                                                                                                | Yes <input type="checkbox"/> No <input type="checkbox"/>                                    |
|              | ( <i>If yes</i> ) choose all that apply                                                                                             |                                                                                             |
|              | Myocardial infarction                                                                                                               | Yes <input type="checkbox"/> No <input type="checkbox"/>                                    |
|              | Heart failure                                                                                                                       | Yes <input type="checkbox"/> No <input type="checkbox"/>                                    |
|              | Other cardiac event                                                                                                                 | Yes <input type="checkbox"/> No <input type="checkbox"/>                                    |
|              | ( <i>If yes</i> ) specify _____                                                                                                     |                                                                                             |
| <b>3.18.</b> | <b>Nephrotoxic drugs</b>                                                                                                            | Yes <input type="checkbox"/> No <input type="checkbox"/>                                    |
|              | ( <i>If yes</i> ) specify _____                                                                                                     |                                                                                             |
| <b>3.19.</b> | <b>Mechanical obstruction of ureters or bladder</b>                                                                                 | Yes <input type="checkbox"/> No <input type="checkbox"/>                                    |
| <b>3.20.</b> | <b>Other</b>                                                                                                                        | Yes <input type="checkbox"/> No <input type="checkbox"/>                                    |
|              | ( <i>If yes</i> ) specify _____                                                                                                     |                                                                                             |
| <b>3.21.</b> | <b>Underlying cause is not known (at time of survey completion)</b>                                                                 | Yes <input type="checkbox"/> No <input type="checkbox"/>                                    |
| <hr/>        |                                                                                                                                     |                                                                                             |
| <b>4.</b>    | <b>Did this woman have any kidney problems associated with previous pregnancies?</b>                                                |                                                                                             |
|              | Yes <input type="checkbox"/> No <input type="checkbox"/> Not known <input type="checkbox"/> Not applicable <input type="checkbox"/> |                                                                                             |
| <b>4.1.</b>  | ( <i>If yes</i> ) Chronic kidney disease                                                                                            | Yes <input type="checkbox"/> No <input type="checkbox"/> Not known <input type="checkbox"/> |
| <b>4.2.</b>  | Dialysis                                                                                                                            | Yes <input type="checkbox"/> No <input type="checkbox"/> Not known <input type="checkbox"/> |
| <b>4.3.</b>  | Transplant                                                                                                                          | Yes <input type="checkbox"/> No <input type="checkbox"/> Not known <input type="checkbox"/> |
| <b>4.4.</b>  | Acute kidney failure                                                                                                                | Yes <input type="checkbox"/> No <input type="checkbox"/> Not known <input type="checkbox"/> |
| <hr/>        |                                                                                                                                     |                                                                                             |
| <b>5.</b>    | <b>Did this woman have a natural/native kidney biopsy PRIOR to this pregnancy?</b>                                                  |                                                                                             |
|              | Yes <input type="checkbox"/> No <input type="checkbox"/> Not known <input type="checkbox"/>                                         |                                                                                             |
|              | <i>(If yes)</i> please attach non identifiable reports                                                                              |                                                                                             |
| <hr/>        |                                                                                                                                     |                                                                                             |
| <b>6.</b>    | <b>Did this woman have a natural/native kidney biopsy DURING this pregnancy?</b>                                                    |                                                                                             |
|              | Yes <input type="checkbox"/> No <input type="checkbox"/> Not known <input type="checkbox"/>                                         |                                                                                             |
|              | <i>(If yes)</i> please attach non identifiable reports                                                                              |                                                                                             |

**SECTION 1**

|                                                                                             |                                                                                                                                                                                    |
|---------------------------------------------------------------------------------------------|------------------------------------------------------------------------------------------------------------------------------------------------------------------------------------|
| <b>7. Has this woman been reviewed in a Renal Unit or by a Renal Physician?</b>             |                                                                                                                                                                                    |
| Yes <input type="checkbox"/> No <input type="checkbox"/> Not known <input type="checkbox"/> |                                                                                                                                                                                    |
| <b>7.1.</b>                                                                                 | (If yes) Reviewed prior to this pregnancy? Yes <input type="checkbox"/> No <input type="checkbox"/> Not known <input type="checkbox"/>                                             |
| <b>7.2.</b>                                                                                 | (If yes) Reviewed during this pregnancy? Yes <input type="checkbox"/> No <input type="checkbox"/> Not known <input type="checkbox"/>                                               |
|                                                                                             | Gestation of first nephrologist review (weeks) _____                                                                                                                               |
|                                                                                             | Date of review: ____/____/____                                                                                                                                                     |
|                                                                                             | Reviewed in a high risk pregnancy clinic Yes <input type="checkbox"/> No <input type="checkbox"/> Not known <input type="checkbox"/>                                               |
|                                                                                             | Reviewed in a general renal clinic Yes <input type="checkbox"/> No <input type="checkbox"/> Not known <input type="checkbox"/>                                                     |
| <b>8. Where was the kidney condition primarily managed? (select one)</b>                    |                                                                                                                                                                                    |
| <input type="checkbox"/> Adult obstetric HDU/ICU                                            |                                                                                                                                                                                    |
| <input type="checkbox"/> Adult non-obstetric HDU/ICU                                        |                                                                                                                                                                                    |
| <input type="checkbox"/> Renal Unit                                                         |                                                                                                                                                                                    |
| <input type="checkbox"/> General Maternity Ward                                             |                                                                                                                                                                                    |
| <input type="checkbox"/> Emergency Department                                               |                                                                                                                                                                                    |
| <input type="checkbox"/> Other                                                              |                                                                                                                                                                                    |
| (If other) specify _____                                                                    |                                                                                                                                                                                    |
| <b>9. Was this woman transferred to another hospital at any time?</b>                       |                                                                                                                                                                                    |
| Yes <input type="checkbox"/> No <input type="checkbox"/> Not known <input type="checkbox"/> |                                                                                                                                                                                    |
| (If yes)                                                                                    |                                                                                                                                                                                    |
| <b>9.1.</b>                                                                                 | To access renal services Yes <input type="checkbox"/> No <input type="checkbox"/> Not known <input type="checkbox"/>                                                               |
| <b>9.2.</b>                                                                                 | To access adult ICU Yes <input type="checkbox"/> No <input type="checkbox"/> Not known <input type="checkbox"/>                                                                    |
| <b>9.3.</b>                                                                                 | To access neonatal ICU Yes <input type="checkbox"/> No <input type="checkbox"/> Not known <input type="checkbox"/>                                                                 |
| <b>10. Management of kidney problem (choose all that apply)</b>                             |                                                                                                                                                                                    |
| <b>10.1.</b>                                                                                | Oral Fluid therapy Yes <input type="checkbox"/> No <input type="checkbox"/> Not known <input type="checkbox"/>                                                                     |
| <b>10.2.</b>                                                                                | Intravenous Fluid therapy Yes <input type="checkbox"/> No <input type="checkbox"/> Not known <input type="checkbox"/>                                                              |
| <b>10.3.</b>                                                                                | Inotropic support Yes <input type="checkbox"/> No <input type="checkbox"/> Not known <input type="checkbox"/>                                                                      |
| <b>10.4.</b>                                                                                | Dialysis (complete dialysis section) Yes <input type="checkbox"/> No <input type="checkbox"/> Not known <input type="checkbox"/>                                                   |
| <b>10.5.</b>                                                                                | Antibiotics for sepsis Yes <input type="checkbox"/> No <input type="checkbox"/> Not known <input type="checkbox"/>                                                                 |
| <b>10.6.</b>                                                                                | Blood transfusion Yes <input type="checkbox"/> No <input type="checkbox"/> Not known <input type="checkbox"/>                                                                      |
| <b>10.7.</b>                                                                                | Immunosuppressive therapy Yes <input type="checkbox"/> No <input type="checkbox"/> Not known <input type="checkbox"/>                                                              |
|                                                                                             | (If yes) specify _____                                                                                                                                                             |
| <b>10.8.</b>                                                                                | Plasma exchange Yes <input type="checkbox"/> No <input type="checkbox"/> Not known <input type="checkbox"/>                                                                        |
| <b>10.9.</b>                                                                                | Eculizumab (for atypical Haemolytic uraemic syndrome) Yes <input type="checkbox"/> No <input type="checkbox"/> Not known <input type="checkbox"/>                                  |
| <b>10.10.</b>                                                                               | Urinary catheterisation Yes <input type="checkbox"/> No <input type="checkbox"/> Not known <input type="checkbox"/>                                                                |
| <b>10.11.</b>                                                                               | Other measures to relieve urinary tract obstruction (e.g nephrostomy, stone retrieval) Yes <input type="checkbox"/> No <input type="checkbox"/> Not known <input type="checkbox"/> |
| <b>10.12.</b>                                                                               | Diuretic therapy Yes <input type="checkbox"/> No <input type="checkbox"/> Not known <input type="checkbox"/>                                                                       |
| <b>10.13.</b>                                                                               | Treatment of hyperkalaemia Yes <input type="checkbox"/> No <input type="checkbox"/> Not known <input type="checkbox"/>                                                             |
|                                                                                             | (If yes) Dialysis for hyperkalaemia Yes <input type="checkbox"/> No <input type="checkbox"/> Not known <input type="checkbox"/>                                                    |
| <b>10.14.</b>                                                                               | Other treatments Yes <input type="checkbox"/> No <input type="checkbox"/> Not known <input type="checkbox"/>                                                                       |
|                                                                                             | (If yes) specify _____                                                                                                                                                             |

**SECTION 1**

| 11. RENAL PARAMETER READINGS IN THIS PREGNANCY – HIGHEST VALUE (*except haemoglobin) |               |      |            |      |                           |      |                           |      |
|--------------------------------------------------------------------------------------|---------------|------|------------|------|---------------------------|------|---------------------------|------|
|                                                                                      | PRE-PREGNANCY |      | AT BOOKING |      | 1 <sup>ST</sup> TRIMESTER |      | 2 <sup>ND</sup> TRIMESTER |      |
|                                                                                      | Value         | Date | Value      | Date | Value                     | Date | Value                     | Date |
| Serum Creatinine (µmol/L)                                                            |               |      |            |      |                           |      |                           |      |
| Estimated GFR                                                                        |               |      |            |      |                           |      |                           |      |
| Serum Urea (mmol/L)                                                                  |               |      |            |      |                           |      |                           |      |
| Serum potassium (mmol/L)                                                             |               |      |            |      |                           |      |                           |      |
| Serum phosphate (mmol/L)                                                             |               |      |            |      |                           |      |                           |      |
| Serum uric acid (µmol/L)                                                             |               |      |            |      |                           |      |                           |      |
| Haemoglobin (lowest)* (g/L)                                                          |               |      |            |      |                           |      |                           |      |
| Urine Protein (P:Cr) (mg/mmol)                                                       |               |      |            |      |                           |      |                           |      |
| Urine Protein (24 hour) (g/24hr)                                                     |               |      |            |      |                           |      |                           |      |
| Urine A:Cr (mg/mmol)                                                                 |               |      |            |      |                           |      |                           |      |

|                                  | 3 <sup>RD</sup> TRIMESTER |      | AT DELIVERY |      | AT DISCHARGE |      |
|----------------------------------|---------------------------|------|-------------|------|--------------|------|
|                                  | Value                     | Date | Value       | Date | Value        | Date |
| Serum Creatinine (µmol/L)        |                           |      |             |      |              |      |
| Estimated GFR                    |                           |      |             |      |              |      |
| Serum Urea (mmol/L)              |                           |      |             |      |              |      |
| Serum potassium (mmol/L)         |                           |      |             |      |              |      |
| Serum phosphate (mmol/L)         |                           |      |             |      |              |      |
| Serum uric acid (µmol/L)         |                           |      |             |      |              |      |
| Haemoglobin (lowest)* (g/L)      |                           |      |             |      |              |      |
| Urine Protein (P:Cr) (mg/mmol)   |                           |      |             |      |              |      |
| Urine Protein (24 hour) (g/24hr) |                           |      |             |      |              |      |
| Urine A:Cr (mg/mmol)             |                           |      |             |      |              |      |

12. Was this woman admitted to hospital during this pregnancy (other than for delivery)?  
 Yes  No  Not known   
 If yes  
 State admission and discharge dates, reason, and treatment given.

Date admitted \_\_\_\_\_ Date discharged \_\_\_\_\_  
 Reason \_\_\_\_\_  
 Treatment \_\_\_\_\_  
 \_\_\_\_\_  
 \_\_\_\_\_

## SECTION 2

**SECTION 2: TRANSPLANT HISTORY**

- 1. Did this woman have a functioning kidney transplant at conception?**  
Yes  No  Not known  **IF NO, SKIP TO SECTION 3**

(If yes) Date of current transplant \_\_\_\_/\_\_\_\_/\_\_\_\_

Transplant source (current transplant) (choose one)  Living donor  
 Deceased donor  
 Not known

- 1.1. Has this woman had more than one kidney transplant?** Yes  No  Not known

(If yes) Total number of kidney transplants \_\_\_\_\_

- 1.2. Has this woman had a non-kidney transplant?**

Yes  No  Not known

(If yes) Pancreas Yes  No  Not known

Date \_\_\_\_/\_\_\_\_/\_\_\_\_

Liver Yes  No  Not known

Date \_\_\_\_/\_\_\_\_/\_\_\_\_

Other Yes  No  Not known

Date \_\_\_\_/\_\_\_\_/\_\_\_\_

Other transplant (specify) \_\_\_\_\_

- 2. Has this woman had a transplant kidney biopsy in the 12 months PRIOR to this pregnancy?**

Yes  No  Not known

(If yes) attach deidentified reports

- 3. Did this woman have a transplant kidney biopsy DURING this pregnancy?**

Yes  No  Not known

(If yes) attach deidentified reports

- 4. Was there treatment for transplant rejection in this pregnancy?**

Yes  No  Not known

(If yes) How was rejection treated?

- 4.1.** Increased dose of existing immunosuppression Yes  No  Not known

- 4.2.** Intravenous methylprednisolone Yes  No  Not known

- 4.3.** T-cell depletion therapy (drugs such as ATG or OKT3) Yes  No  Not known

- 4.4.** Plasma exchange Yes  No  Not known

- 4.5.** Photopheresis Yes  No  Not known

- 4.6.** Other therapy Yes  No  Not known

Other (specify) \_\_\_\_\_

## SECTION 3

## SECTION 3: DIALYSIS IN THIS PREGNANCY

1. Did this woman receive ANY dialysis during this pregnancy?

Yes  No  Not known **IF NO, SKIP TO SECTION 4***(If yes)* please contact the AMOSS team if you need assistance2. **COMMENCEMENT OF DIALYSIS IN THIS PREGNANCY (women not previously receiving dialysis)**

2.1. Did this woman commence dialysis therapy FOR THE FIRST TIME DURING this pregnancy?

Yes  No  Not known **IF NO, SKIP TO QUESTION 3***(If not known), please contact the AMOSS team for assistance**(If yes)* please answer questions below

2.2. Reason for commencing dialysis therapy (choose all that apply)

Newly diagnosed significant kidney dysfunction Yes  No  Not known Pre-existing kidney disease / impairment that became worse during pregnancy Yes  No  Not known Uncontrolled hypertension Yes  No  Not known Poor fetal growth Yes  No  Not known Fluid overload Yes  No  Not known Pre-eclampsia Yes  No  Not known High potassium Yes  No  Not known Acidosis Yes  No  Not known Uraemic symptoms (nausea, vomiting, itching) Yes  No  Not known Other Yes  No  Not known *(If yes)* specify \_\_\_\_\_

2.3. First Haemodialysis This Pregnancy – Treatment Details

What date did dialysis start? \_\_\_\_/\_\_\_\_/\_\_\_\_

Dialysis duration (hours) \_\_\_\_\_

Type of dialysis (choose one)

 Intermittent ContinuousHeparin or citrate anticoagulation Yes  No  Not known 

Pre-dialysis creatinine \_\_\_\_\_ (µmol/L)

Pre-dialysis urea \_\_\_\_\_ (mmol/L)

Pre-dialysis phosphate \_\_\_\_\_ (mmol/L)

Pre-dialysis potassium \_\_\_\_\_ (mmol/L)

Pre-dialysis weight \_\_\_\_\_ (kg)

Site of first dialysis treatment (choose one)

 ICU Ward Outpatient Dialysis UnitIf this woman initially received continuous dialysis (in intensive care), was this later changed to intermittent dialysis? Yes  No  Not known *(If yes)*

Date of first intermittent dialysis \_\_\_\_/\_\_\_\_/\_\_\_\_

Total number of intermittent dialysis treatments \_\_\_\_\_

Date of last dialysis treatment (if dialysis ceased before discharge)? \_\_\_\_/\_\_\_\_/\_\_\_\_

Did this woman continue to have ongoing dialysis after discharge (or a plan for further dialysis)?

Yes  No  Not known Did this woman remain on dialysis permanently? Yes  No  Not known 

What date did dialysis eventually cease (if known)? \_\_\_\_/\_\_\_\_/\_\_\_\_

**SECTION 3**

**2.4. Monitoring received during first dialysis treatment** *(select all that apply)*

Fetal CTG Yes  No  Not known   
 Dopplers Yes  No  Not known   
 Maternal cardiac monitoring Yes  No  Not known   
 Other monitoring Yes  No  Not known   
*(If yes) specify* \_\_\_\_\_

**3. CHRONIC/ONGOING DIALYSIS**

**3.1. Date of commencing chronic maintenance dialysis** *(pre-conception)* \_\_\_\_/\_\_\_\_/\_\_\_\_

**3.2. Last pre-conception dialysis modality** *(choose one)*  peritoneal dialysis (PD)  
 haemodialysis

**3.3. Total hours of dialysis per week** *(pre-conception)* \_\_\_\_\_

**3.4. Change of dialysis modality during pregnancy?**  
 Yes  No  Not known   
*(If yes) choose one*  Haemodialysis changed to peritoneal dialysis  
 Peritoneal dialysis changed to haemodialysis  
 Date of change of modality \_\_\_\_/\_\_\_\_/\_\_\_\_  
 Reason for change of modality \_\_\_\_\_

**3.5. Dialysis modality DURING this pregnancy** *(choose one)*  
 haemodialysis **IF YES, SKIP TO QUESTION 4**  
 peritoneal dialysis (PD) **IF YES, SKIP TO QUESTION 6**

**4. CHRONIC HAEMODIALYSIS DURING THIS PREGNANCY**  
*Please skip this section and move to Section 4 if you have attached deidentified dialysis charts.*

|                                      | PRE-PREGNANCY                                                                                                 | 1 <sup>ST</sup> TRIMESTER (1-13 WEEKS)                                                                        | 2 <sup>ND</sup> TRIMESTER (14-27 WEEKS)                                                                       | 3 <sup>RD</sup> TRIMESTER (28+ WEEKS)                                                                         |
|--------------------------------------|---------------------------------------------------------------------------------------------------------------|---------------------------------------------------------------------------------------------------------------|---------------------------------------------------------------------------------------------------------------|---------------------------------------------------------------------------------------------------------------|
| Pre dialysis weight                  | kg                                                                                                            | kg                                                                                                            | kg                                                                                                            | kg                                                                                                            |
| Post dialysis weight                 | kg                                                                                                            | kg                                                                                                            | kg                                                                                                            | kg                                                                                                            |
| No. of dialysis sessions per week    |                                                                                                               |                                                                                                               |                                                                                                               |                                                                                                               |
| No. of hours per dialysis session    |                                                                                                               |                                                                                                               |                                                                                                               |                                                                                                               |
| Highest pre-dialysis urea (mmol/L)   |                                                                                                               |                                                                                                               |                                                                                                               |                                                                                                               |
| Heparin during dialysis              | Yes <input type="checkbox"/> No <input type="checkbox"/><br>Not known <input type="checkbox"/>                | Yes <input type="checkbox"/> No <input type="checkbox"/><br>Not known <input type="checkbox"/>                | Yes <input type="checkbox"/> No <input type="checkbox"/><br>Not known <input type="checkbox"/>                | Yes <input type="checkbox"/> No <input type="checkbox"/><br>Not known <input type="checkbox"/>                |
| Dialysate K+ (mmol/L)                |                                                                                                               |                                                                                                               |                                                                                                               |                                                                                                               |
| Dialysate Bicarbonate (mmol/L)       |                                                                                                               |                                                                                                               |                                                                                                               |                                                                                                               |
| Dialysate Calcium (mmol/L)           |                                                                                                               |                                                                                                               |                                                                                                               |                                                                                                               |
| Erythropoietin administration        | Yes <input type="checkbox"/> No <input type="checkbox"/><br>Not known <input type="checkbox"/>                | Yes <input type="checkbox"/> No <input type="checkbox"/><br>Not known <input type="checkbox"/>                | Yes <input type="checkbox"/> No <input type="checkbox"/><br>Not known <input type="checkbox"/>                | Yes <input type="checkbox"/> No <input type="checkbox"/><br>Not known <input type="checkbox"/>                |
| Iron administration                  | Yes <input type="checkbox"/> No <input type="checkbox"/><br>Not known <input type="checkbox"/>                | Yes <input type="checkbox"/> No <input type="checkbox"/><br>Not known <input type="checkbox"/>                | Yes <input type="checkbox"/> No <input type="checkbox"/><br>Not known <input type="checkbox"/>                | Yes <input type="checkbox"/> No <input type="checkbox"/><br>Not known <input type="checkbox"/>                |
| Site of dialysis <i>(choose one)</i> | Hospital <input type="checkbox"/><br>Home <input type="checkbox"/><br>Satellite Unit <input type="checkbox"/> | Hospital <input type="checkbox"/><br>Home <input type="checkbox"/><br>Satellite Unit <input type="checkbox"/> | Hospital <input type="checkbox"/><br>Home <input type="checkbox"/><br>Satellite Unit <input type="checkbox"/> | Hospital <input type="checkbox"/><br>Home <input type="checkbox"/><br>Satellite Unit <input type="checkbox"/> |
| Nocturnal haemodialysis              | Yes <input type="checkbox"/> No <input type="checkbox"/><br>Not known <input type="checkbox"/>                | Yes <input type="checkbox"/> No <input type="checkbox"/><br>Not known <input type="checkbox"/>                | Yes <input type="checkbox"/> No <input type="checkbox"/><br>Not known <input type="checkbox"/>                | Yes <input type="checkbox"/> No <input type="checkbox"/><br>Not known <input type="checkbox"/>                |



**SECTION 3**

**5. Did this woman have any vascular access for dialysis during this pregnancy?**  
 Yes  No  Not known   
 (If yes) please answer questions below **IF NO SKIP TO SECTION 4**

---

**5.1. Did this woman have a pre-existing functioning arteriovenous fistula in situ?**  
 Yes  No  Not known   
 (If yes) type of fistula (choose one)  Native fistula  
 Artificial graft

---

**5.2. Was an arteriovenous fistula created during THIS pregnancy?**  
 Yes  No  Not known   
 If yes  
 Date at of creation \_\_\_\_/\_\_\_\_/\_\_\_\_\_  
 Serum creatinine at creation \_\_\_\_\_ (µmol/L)

---

**5.3. Was any other vascular access for dialysis used during this pregnancy?**  
 Yes  No  Not known   
 (If yes) Temporary Catheter (Vascath) Yes  No  Not known   
 (If yes) Date of insertion \_\_\_\_/\_\_\_\_/\_\_\_\_\_  
 Tunnelled Catheter (Permcath) Yes  No  Not known   
 (If yes) Date of insertion \_\_\_\_/\_\_\_\_/\_\_\_\_\_

---

**Access Related Complications**

**5.4. Sepsis / bacteraemia** Yes  No  Not known   
 (If yes) Date \_\_\_\_/\_\_\_\_/\_\_\_\_\_  
 Organism \_\_\_\_\_  
 Antibiotics \_\_\_\_\_  
 Other details \_\_\_\_\_

**5.5. Thrombosis** Yes  No  Not known   
 (If yes) Date \_\_\_\_/\_\_\_\_/\_\_\_\_\_  
 Other details \_\_\_\_\_

**5.6. Bleeding** Yes  No  Not known   
**5.7. Difficulty needling** Yes  No  Not known   
**5.8. Vessel stenosis requiring angioplasty** Yes  No  Not known   
**5.9. Other** Yes  No  Not known   
 (If yes) specify \_\_\_\_\_

**6. PERITONEAL DIALYSIS (PD)**

---

**6.1. Was this woman receiving any peritoneal dialysis (PD) during DURING this pregnancy?**  
 Yes  No  Not known   
**IF NO, SKIP TO SECTION 4**  
 (If yes) choose one  Automated  
 Ambulatory (manual)

**6.2. PD Regime in each trimester** (% glucose, additional icodextran and number of exchanges – please contact the AMOSS team for assistance with data collection – [amos@uts.edu.au](mailto:amos@uts.edu.au) or (02) 9514 8041)

**1<sup>st</sup> Trimester Regime**

\_\_\_\_\_

\_\_\_\_\_

\_\_\_\_\_

\_\_\_\_\_

**SECTION 3**

**2<sup>nd</sup> Trimester Regime**

\_\_\_\_\_  
 \_\_\_\_\_  
 \_\_\_\_\_  
 \_\_\_\_\_

**3<sup>rd</sup> Trimester Regime**

\_\_\_\_\_  
 \_\_\_\_\_  
 \_\_\_\_\_  
 \_\_\_\_\_

**6.3. Did PD peritonitis occur during this pregnancy?**

Yes  No  Not known   
 (If yes) Date            \_\_\_/\_\_\_/\_\_\_\_\_  
                   Organism            \_\_\_\_\_  
                   Antibiotics            \_\_\_\_\_  
                   Other (details)        \_\_\_\_\_

**6.4. Did a PD catheter exit site infection occur during this pregnancy?**

Yes  No  Not known   
 (If yes) Date            \_\_\_/\_\_\_/\_\_\_\_\_  
                   Organism            \_\_\_\_\_  
                   Antibiotics            \_\_\_\_\_  
                   Other (details)        \_\_\_\_\_

**6.5. Was PD adequacy measured during this pregnancy?**

Yes  No  Not known   
 (If yes) Date            \_\_\_/\_\_\_/\_\_\_\_\_  
                   Adequacy result        \_\_\_\_\_ (free text)

**6.6. Was residual urine output measured during this pregnancy?**

Yes  No  Not known   
 (If yes) Date            \_\_\_/\_\_\_/\_\_\_\_\_  
                   Volume                \_\_\_\_\_ (ml)

**6.7. Was a Peritoneal Equilibrium Test (PET) performed during this pregnancy?**

Yes  No  Not known   
 (If yes) Date            \_\_\_/\_\_\_/\_\_\_\_\_  
                   Result                 \_\_\_\_\_

**6.8. Did any other complications of Peritoneal Dialysis occur during this pregnancy?**

Yes  No  Not known   
 (If yes) Details        \_\_\_\_\_  
                                   \_\_\_\_\_

SECTION 4

**SECTION 4: MEDICATIONS AND OTHER THERAPIES**

**1. Anti-Hypertensive Medications PRIOR to Pregnancy**

**1.1. Did this woman take ACE Inhibitors (e.g. perindopril, ramipril, enalapril, captopril) or Angiotensin Receptor Blockers (e.g. irbesartan, candesartan, telmisartan) PRIOR to this pregnancy?**

*(if yes) Did use of ACE Inhibitors or Angiotensin Receptor Blockers cease PRIOR to this conception?*

Yes  No  Not known

**2. ANTI-HYPERTENSIVE MEDICATIONS**

|                                                 | PRE-PREGNANCY                                                                                                     | ANTEPARTUM                                                                                                        | INTRAPARTUM                                                                                                       | POSTPARTUM                                                                                                        | AT DISCHARGE                                                                                                      |
|-------------------------------------------------|-------------------------------------------------------------------------------------------------------------------|-------------------------------------------------------------------------------------------------------------------|-------------------------------------------------------------------------------------------------------------------|-------------------------------------------------------------------------------------------------------------------|-------------------------------------------------------------------------------------------------------------------|
| <b>Methyldopa</b><br><i>(Aldomet, Hydopa)</i>   | Yes <input type="checkbox"/> No <input type="checkbox"/><br>Not known <input type="checkbox"/>                    | Yes <input type="checkbox"/> No <input type="checkbox"/><br>Not known <input type="checkbox"/>                    | Yes <input type="checkbox"/> No <input type="checkbox"/><br>Not known <input type="checkbox"/>                    | Yes <input type="checkbox"/> No <input type="checkbox"/><br>Not known <input type="checkbox"/>                    | Yes <input type="checkbox"/> No <input type="checkbox"/><br>Not known <input type="checkbox"/>                    |
| <b>Nifedipine</b><br><i>(Adalat, Adefin)</i>    | Yes <input type="checkbox"/> No <input type="checkbox"/><br>Not known <input type="checkbox"/>                    | Yes <input type="checkbox"/> No <input type="checkbox"/><br>Not known <input type="checkbox"/>                    | Yes <input type="checkbox"/> No <input type="checkbox"/><br>Not known <input type="checkbox"/>                    | Yes <input type="checkbox"/> No <input type="checkbox"/><br>Not known <input type="checkbox"/>                    | Yes <input type="checkbox"/> No <input type="checkbox"/><br>Not known <input type="checkbox"/>                    |
| <b>Labetalol</b><br><i>(Presolol, Trandate)</i> | Yes <input type="checkbox"/> No <input type="checkbox"/><br>Not known <input type="checkbox"/>                    | Yes <input type="checkbox"/> No <input type="checkbox"/><br>Not known <input type="checkbox"/>                    | Yes <input type="checkbox"/> No <input type="checkbox"/><br>Not known <input type="checkbox"/>                    | Yes <input type="checkbox"/> No <input type="checkbox"/><br>Not known <input type="checkbox"/>                    | Yes <input type="checkbox"/> No <input type="checkbox"/><br>Not known <input type="checkbox"/>                    |
| <b>Oxprenolol</b><br><i>(Corbeton)</i>          | Yes <input type="checkbox"/> No <input type="checkbox"/><br>Not known <input type="checkbox"/>                    | Yes <input type="checkbox"/> No <input type="checkbox"/><br>Not known <input type="checkbox"/>                    | Yes <input type="checkbox"/> No <input type="checkbox"/><br>Not known <input type="checkbox"/>                    | Yes <input type="checkbox"/> No <input type="checkbox"/><br>Not known <input type="checkbox"/>                    | Yes <input type="checkbox"/> No <input type="checkbox"/><br>Not known <input type="checkbox"/>                    |
| <b>Other:</b>                                   | Yes <input type="checkbox"/> No <input type="checkbox"/><br>Not known <input type="checkbox"/><br><b>specify:</b> | Yes <input type="checkbox"/> No <input type="checkbox"/><br>Not known <input type="checkbox"/><br><b>specify:</b> | Yes <input type="checkbox"/> No <input type="checkbox"/><br>Not known <input type="checkbox"/><br><b>specify:</b> | Yes <input type="checkbox"/> No <input type="checkbox"/><br>Not known <input type="checkbox"/><br><b>specify:</b> | Yes <input type="checkbox"/> No <input type="checkbox"/><br>Not known <input type="checkbox"/><br><b>specify:</b> |

**3. IMMUNOSUPPRESSANT MEDICATIONS**

|                                 | PRE-PREGNANCY                                                                                                     | ANTEPARTUM                                                                                                        | INTRAPARTUM                                                                                                       | POSTPARTUM                                                                                                        | AT DISCHARGE                                                                                                      |
|---------------------------------|-------------------------------------------------------------------------------------------------------------------|-------------------------------------------------------------------------------------------------------------------|-------------------------------------------------------------------------------------------------------------------|-------------------------------------------------------------------------------------------------------------------|-------------------------------------------------------------------------------------------------------------------|
| <b>Mycophenolate</b>            | Yes <input type="checkbox"/> No <input type="checkbox"/><br>Not known <input type="checkbox"/>                    | Yes <input type="checkbox"/> No <input type="checkbox"/><br>Not known <input type="checkbox"/>                    | Yes <input type="checkbox"/> No <input type="checkbox"/><br>Not known <input type="checkbox"/>                    | Yes <input type="checkbox"/> No <input type="checkbox"/><br>Not known <input type="checkbox"/>                    | Yes <input type="checkbox"/> No <input type="checkbox"/><br>Not known <input type="checkbox"/>                    |
| <b>Azathioprine</b>             | Yes <input type="checkbox"/> No <input type="checkbox"/><br>Not known <input type="checkbox"/>                    | Yes <input type="checkbox"/> No <input type="checkbox"/><br>Not known <input type="checkbox"/>                    | Yes <input type="checkbox"/> No <input type="checkbox"/><br>Not known <input type="checkbox"/>                    | Yes <input type="checkbox"/> No <input type="checkbox"/><br>Not known <input type="checkbox"/>                    | Yes <input type="checkbox"/> No <input type="checkbox"/><br>Not known <input type="checkbox"/>                    |
| <b>Sirolimus / everolimus</b>   | Yes <input type="checkbox"/> No <input type="checkbox"/><br>Not known <input type="checkbox"/>                    | Yes <input type="checkbox"/> No <input type="checkbox"/><br>Not known <input type="checkbox"/>                    | Yes <input type="checkbox"/> No <input type="checkbox"/><br>Not known <input type="checkbox"/>                    | Yes <input type="checkbox"/> No <input type="checkbox"/><br>Not known <input type="checkbox"/>                    | Yes <input type="checkbox"/> No <input type="checkbox"/><br>Not known <input type="checkbox"/>                    |
| <b>Tacrolimus/ cyclosporine</b> | Yes <input type="checkbox"/> No <input type="checkbox"/><br>Not known <input type="checkbox"/>                    | Yes <input type="checkbox"/> No <input type="checkbox"/><br>Not known <input type="checkbox"/>                    | Yes <input type="checkbox"/> No <input type="checkbox"/><br>Not known <input type="checkbox"/>                    | Yes <input type="checkbox"/> No <input type="checkbox"/><br>Not known <input type="checkbox"/>                    | Yes <input type="checkbox"/> No <input type="checkbox"/><br>Not known <input type="checkbox"/>                    |
| <b>Prednisolone</b>             | Yes <input type="checkbox"/> No <input type="checkbox"/><br>Not known <input type="checkbox"/>                    | Yes <input type="checkbox"/> No <input type="checkbox"/><br>Not known <input type="checkbox"/>                    | Yes <input type="checkbox"/> No <input type="checkbox"/><br>Not known <input type="checkbox"/>                    | Yes <input type="checkbox"/> No <input type="checkbox"/><br>Not known <input type="checkbox"/>                    | Yes <input type="checkbox"/> No <input type="checkbox"/><br>Not known <input type="checkbox"/>                    |
| <b>Other:</b>                   | Yes <input type="checkbox"/> No <input type="checkbox"/><br>Not known <input type="checkbox"/><br><b>specify:</b> | Yes <input type="checkbox"/> No <input type="checkbox"/><br>Not known <input type="checkbox"/><br><b>specify:</b> | Yes <input type="checkbox"/> No <input type="checkbox"/><br>Not known <input type="checkbox"/><br><b>specify:</b> | Yes <input type="checkbox"/> No <input type="checkbox"/><br>Not known <input type="checkbox"/><br><b>specify:</b> | Yes <input type="checkbox"/> No <input type="checkbox"/><br>Not known <input type="checkbox"/><br><b>specify:</b> |
| <b>Other:</b>                   | Yes <input type="checkbox"/> No <input type="checkbox"/><br>Not known <input type="checkbox"/><br><b>specify:</b> | Yes <input type="checkbox"/> No <input type="checkbox"/><br>Not known <input type="checkbox"/><br><b>specify:</b> | Yes <input type="checkbox"/> No <input type="checkbox"/><br>Not known <input type="checkbox"/><br><b>specify:</b> | Yes <input type="checkbox"/> No <input type="checkbox"/><br>Not known <input type="checkbox"/><br><b>specify:</b> | Yes <input type="checkbox"/> No <input type="checkbox"/><br>Not known <input type="checkbox"/><br><b>specify:</b> |

**SECTION 4**

**4. Were any other drugs (apart from anti-hypertensive agents and immunosuppressant agents) CEASED for this pregnancy?**  
 Yes  No  Not known  *Choose one*  
 (If yes)  Ceased PRIOR to conception OR  
 Name of drug \_\_\_\_\_  Ceased AFTER conception

Name of drug \_\_\_\_\_  Ceased PRIOR to conception OR  
 Ceased AFTER conception

**5. OTHER TREATMENTS DURING THIS PREGNANCY**

**5.1. Aspirin** Yes  No  Not known

**5.2. Erythropoietin** Yes  No  Not known   
 (If yes) Name of agent \_\_\_\_\_  
 Treatment pre-pregnancy? Yes  No  Not known

**5.3. Iron therapy** Yes  No  Not known   
 (If yes) Oral Yes  No  Not known   
 Intravenous Yes  No  Not known

**5.4. Blood transfusion** Yes  No  Not known   
 (If yes) Date \_\_\_/\_\_\_/\_\_\_\_\_  
 Number of units \_\_\_\_\_  
 Reason for transfusion  
 Chronic anaemia Yes  No  Not known   
 Acute blood loss Yes  No  Not known   
 Other Yes  No  Not known   
 (If yes) specify \_\_\_\_\_

**5.5. Heparin (unfractionated or LMW)** Yes  No  Not known   
 (If yes) Name of agent \_\_\_\_\_  
 Indication \_\_\_\_\_  
 Date started \_\_\_/\_\_\_/\_\_\_\_\_

**5.6. Corticosteroids** (if not previously receiving corticosteroids)  
 Yes  No  Not known  Not applicable   
 (If yes) Methylprednisolone Yes  No  Not known   
 (If yes) Indication \_\_\_\_\_  
 Date started \_\_\_/\_\_\_/\_\_\_\_\_  
 Oral prednisolone Yes  No  Not known   
 (If yes) Indication \_\_\_\_\_  
 Date started \_\_\_/\_\_\_/\_\_\_\_\_  
 Betamethasone/dexamethasone for fetal lung maturity/thrombocytopenia  
 Yes  No  Not known   
 (If yes) Indication \_\_\_\_\_  
 Date started \_\_\_/\_\_\_/\_\_\_\_\_

**5.7. Intravenous immunoglobulin** Yes  No  Not known   
 (If yes) Indication \_\_\_\_\_

**5.8. Magnesium sulphate (MgSO4)** Yes  No  Not known

**SECTION 4****5.9. Antibiotics for TREATMENT of infection (NOT single doses)**Yes  No  Not known *If yes*

Name of agent \_\_\_\_\_

Indication \_\_\_\_\_

**5.10. Antibiotics for PROPHYLAXIS against infection (NOT single doses)**Yes  No  Not known *If yes*

Name of agent \_\_\_\_\_

Indication \_\_\_\_\_

**5.11. Non-steroidal anti-inflammatory drugs**Yes  No  Not known *If yes*

Name of agent \_\_\_\_\_

Indication \_\_\_\_\_

**5.12. Folic acid**Yes  No  Not known *If yes*

Dose (mg/day) \_\_\_\_\_

**5.13. Did the patient start any other new medications started during this pregnancy (excluding the above, multivitamins, Vitamin D and calcium)?**Yes  No  Not known *If yes*

Name of agent/date commenced \_\_\_\_\_

\_\_\_\_\_

**SECTION 5**

**SECTION 5: ANTENATAL, BIRTH AND POSTPARTUM CARE**

**1. Did this woman have pre-existing, known hypertension PRIOR to pregnancy?**  
 Yes  No  Not known   
 (If yes)

**1.1. Hypertension type (choose one)**  
 Untreated hypertension: Hypertensive > 140/90 mmHg, not on treatment **OR**  
 Uncontrolled hypertension: Hypertensive > 140/90 mmHg, on anti-hypertensive therapy **OR**  
 Controlled hypertension: Normotensive <= 140/90 mmHg, on anti-hypertensive therapy **OR**  
 Not known

(If no or not known)

**1.2. Did this woman develop newly diagnosed hypertension during this pregnancy?**  
 Yes  No  Not known   
 (If yes) Was hypertension first identified at the booking visit? Yes  No  Not known   
 Date hypertension first detected: \_\_\_\_/\_\_\_\_/\_\_\_\_

| 2. BLOOD PRESSURE READINGS IN THIS PREGNANCY (HIGHEST) |                                       |      |            |      |                                        |      |                                         |      |
|--------------------------------------------------------|---------------------------------------|------|------------|------|----------------------------------------|------|-----------------------------------------|------|
|                                                        | PRE-PREGNANCY                         |      | AT BOOKING |      | 1 <sup>ST</sup> TRIMESTER (1-13 weeks) |      | 2 <sup>ND</sup> TRIMESTER (14-27 weeks) |      |
|                                                        | Value                                 | Date | Value      | Date | Value                                  | Date | Value                                   | Date |
| Systolic (mmHg)                                        |                                       |      |            |      |                                        |      |                                         |      |
| Diastolic (mmHg)                                       |                                       |      |            |      |                                        |      |                                         |      |
|                                                        | 3 <sup>RD</sup> TRIMESTER (28+ weeks) |      | DELIVERY   |      | DISCHARGE                              |      |                                         |      |
|                                                        | Value                                 | Date | Value      | Date | Value                                  | Date |                                         |      |
| Systolic (mmHg)                                        |                                       |      |            |      |                                        |      |                                         |      |
| Diastolic (mmHg)                                       |                                       |      |            |      |                                        |      |                                         |      |

**3. ANTENATAL SCREENING AND GROWTH SCANS**  
 Please skip this question and move to question 4 if you have attached deidentified scan data

**3.1. Did this woman have 1<sup>st</sup>/2<sup>nd</sup> trimester antenatal screening during this pregnancy?**  
 Yes  No  Not known   
 (If yes)

|                                           | Date | Gestational age (weeks) | Value |
|-------------------------------------------|------|-------------------------|-------|
| PAPPA MoM                                 |      |                         |       |
| Nuchal translucency (NT) scan NT mm       |      |                         |       |
| β-hCG MoM                                 |      |                         |       |
| Adjusted Down Syndrome Risk               |      |                         |       |
| Non-invasive prenatal test (NIPT)         |      |                         |       |
| Umbilical artery pulsatility index (UAPI) |      |                         |       |
| Serum placental growth factor (PIGF)      |      |                         |       |
| Other abnormalities                       |      |                         |       |

**SECTION 5**

**4. Did this woman have a fetal anomaly or growth scan during this pregnancy?**  
 Yes  No  Not known   
 (If yes) How many scans in total? \_\_\_\_\_ (number)

*Please skip this section and move to question 5 if you have attached deidentified scan data*

|                                           | 1 <sup>st</sup> SCAN                                                                                                                                                              |      | 2 <sup>nd</sup> SCAN                                                                                                                                                              |      | 3 <sup>rd</sup> SCAN*                                                                                                                                                             |      |
|-------------------------------------------|-----------------------------------------------------------------------------------------------------------------------------------------------------------------------------------|------|-----------------------------------------------------------------------------------------------------------------------------------------------------------------------------------|------|-----------------------------------------------------------------------------------------------------------------------------------------------------------------------------------|------|
|                                           | Value                                                                                                                                                                             | %ile | Value                                                                                                                                                                             | %ile | Value                                                                                                                                                                             | %ile |
| Date of scan                              |                                                                                                                                                                                   |      |                                                                                                                                                                                   |      |                                                                                                                                                                                   |      |
| Gestational age (weeks)                   |                                                                                                                                                                                   |      |                                                                                                                                                                                   |      |                                                                                                                                                                                   |      |
| Amniotic fluid index (AFI)                | cm                                                                                                                                                                                |      | cm                                                                                                                                                                                |      | cm                                                                                                                                                                                |      |
| Crown-rump length (CRL)                   | mm                                                                                                                                                                                |      | mm                                                                                                                                                                                |      | mm                                                                                                                                                                                |      |
| Deepest vertical pocket (DVP)             | cm                                                                                                                                                                                |      | cm                                                                                                                                                                                |      | cm                                                                                                                                                                                |      |
| Estimated fetal weight (EFW)              | grams                                                                                                                                                                             |      | grams                                                                                                                                                                             |      | grams                                                                                                                                                                             |      |
| Biparietal diameter (BPD)                 | mm                                                                                                                                                                                |      | mm                                                                                                                                                                                |      | mm                                                                                                                                                                                |      |
| Head circumference (HC)                   | mm                                                                                                                                                                                |      | mm                                                                                                                                                                                |      | mm                                                                                                                                                                                |      |
| Abdominal circumference (AC)              | mm                                                                                                                                                                                |      | mm                                                                                                                                                                                |      | mm                                                                                                                                                                                |      |
| Femur Length (FL)                         | mm                                                                                                                                                                                |      | mm                                                                                                                                                                                |      | mm                                                                                                                                                                                |      |
| Umbilical artery pulsatility index (UAPI) |                                                                                                                                                                                   |      |                                                                                                                                                                                   |      |                                                                                                                                                                                   |      |
| Uterine artery resistance index (UARI)    | <input type="checkbox"/> Normal <input type="checkbox"/> Abnormal<br><input type="checkbox"/> Unilateral <input type="checkbox"/> Bilateral<br><input type="checkbox"/> Not known |      | <input type="checkbox"/> Normal <input type="checkbox"/> Abnormal<br><input type="checkbox"/> Unilateral <input type="checkbox"/> Bilateral<br><input type="checkbox"/> Not known |      | <input type="checkbox"/> Normal <input type="checkbox"/> Abnormal<br><input type="checkbox"/> Unilateral <input type="checkbox"/> Bilateral<br><input type="checkbox"/> Not known |      |
| Uterine artery notching                   | <input type="checkbox"/> Mild <input type="checkbox"/> Severe<br><input type="checkbox"/> Unilateral <input type="checkbox"/> Bilateral<br><input type="checkbox"/> Not known     |      | <input type="checkbox"/> Mild <input type="checkbox"/> Severe<br><input type="checkbox"/> Unilateral <input type="checkbox"/> Bilateral<br><input type="checkbox"/> Not known     |      | <input type="checkbox"/> Mild <input type="checkbox"/> Severe<br><input type="checkbox"/> Unilateral <input type="checkbox"/> Bilateral<br><input type="checkbox"/> Not known     |      |

*\*If more than three scans please attach deidentified results at the end of the survey.*

**5. Was pre-eclampsia diagnosed in this pregnancy?**  
 Yes  No  Not known   
 (If yes) Date of onset of pre-eclampsia \_\_\_\_/\_\_\_\_/\_\_\_\_

**Pre-eclampsia features (present at any time)**

|       |                                                                                                    |                                                                                             |
|-------|----------------------------------------------------------------------------------------------------|---------------------------------------------------------------------------------------------|
| 5.1.  | Hypertension ( $\geq 140/90$ mmHg)                                                                 | Yes <input type="checkbox"/> No <input type="checkbox"/> Not known <input type="checkbox"/> |
| 5.2.  | Proteinuria (urine P:Cr > 30 mg/mmol)                                                              | Yes <input type="checkbox"/> No <input type="checkbox"/> Not known <input type="checkbox"/> |
| 5.3.  | Low platelets (< 100,000 x 10 <sup>9</sup> /L)                                                     | Yes <input type="checkbox"/> No <input type="checkbox"/> Not known <input type="checkbox"/> |
| 5.4.  | High uric acid<br>(greater than the upper limit for local lab reference range for gestational age) | Yes <input type="checkbox"/> No <input type="checkbox"/> Not known <input type="checkbox"/> |
| 5.5.  | Renal impairment                                                                                   | Yes <input type="checkbox"/> No <input type="checkbox"/> Not known <input type="checkbox"/> |
| 5.6.  | Liver function derangement                                                                         | Yes <input type="checkbox"/> No <input type="checkbox"/> Not known <input type="checkbox"/> |
| 5.7.  | Headache                                                                                           | Yes <input type="checkbox"/> No <input type="checkbox"/> Not known <input type="checkbox"/> |
| 5.8.  | Upper abdominal or Right Upper quadrant pain                                                       | Yes <input type="checkbox"/> No <input type="checkbox"/> Not known <input type="checkbox"/> |
| 5.9.  | Vomiting                                                                                           | Yes <input type="checkbox"/> No <input type="checkbox"/> Not known <input type="checkbox"/> |
| 5.10. | Neurological symptom (without seizures)                                                            | Yes <input type="checkbox"/> No <input type="checkbox"/> Not known <input type="checkbox"/> |
| 5.11. | Seizures (Eclampsia)                                                                               | Yes <input type="checkbox"/> No <input type="checkbox"/> Not known <input type="checkbox"/> |
| 5.12. | Fetal growth restriction (<10th centile)                                                           | Yes <input type="checkbox"/> No <input type="checkbox"/> Not known <input type="checkbox"/> |
| 5.13. | Oligohydramnios                                                                                    | Yes <input type="checkbox"/> No <input type="checkbox"/> Not known <input type="checkbox"/> |
| 5.14. | Abnormal umbilical artery Dopplers                                                                 | Yes <input type="checkbox"/> No <input type="checkbox"/> Not known <input type="checkbox"/> |

**SECTION 5**

|              |                                                                                                                           |                                                                                             |
|--------------|---------------------------------------------------------------------------------------------------------------------------|---------------------------------------------------------------------------------------------|
| <b>6.</b>    | <b>Did this woman develop new-onset proteinuria in this pregnancy (if not detected prior to pregnancy or at booking)?</b> |                                                                                             |
|              | Yes <input type="checkbox"/> No <input type="checkbox"/> Not known <input type="checkbox"/>                               |                                                                                             |
|              | (If yes) Date proteinuria was first detected: ____/____/____                                                              |                                                                                             |
| <b>7.</b>    | <b>Did this woman have a urinary tract infection during this pregnancy?</b>                                               |                                                                                             |
|              | Yes <input type="checkbox"/> No <input type="checkbox"/> Not known <input type="checkbox"/>                               |                                                                                             |
|              | (If yes) Date ____/____/____ or gestational age                                                                           |                                                                                             |
|              | Organism _____                                                                                                            |                                                                                             |
|              | Treatment _____                                                                                                           |                                                                                             |
| <b>8.</b>    | <b>Did this woman have asymptomatic bacteriuria during this pregnancy?</b>                                                |                                                                                             |
|              | Yes <input type="checkbox"/> No <input type="checkbox"/> Not known <input type="checkbox"/>                               |                                                                                             |
|              | (If yes) Date ____/____/____                                                                                              |                                                                                             |
|              | Treatment _____                                                                                                           |                                                                                             |
| <b>9.</b>    | <b>Was this woman admitted early (pre-37 weeks) for delivery?</b>                                                         |                                                                                             |
|              | Yes <input type="checkbox"/> No <input type="checkbox"/>                                                                  |                                                                                             |
|              | (If yes) Gestation admitted _____ weeks OR Date admitted ____/____/____                                                   |                                                                                             |
| <b>10.</b>   | <b>Monitoring During Delivery (beyond basic vital sign monitoring)</b>                                                    |                                                                                             |
| <b>10.1.</b> | BP monitoring                                                                                                             | Yes <input type="checkbox"/> No <input type="checkbox"/> Not known <input type="checkbox"/> |
| <b>10.2.</b> | Urine output                                                                                                              | Yes <input type="checkbox"/> No <input type="checkbox"/> Not known <input type="checkbox"/> |
| <b>10.3.</b> | Arterial line                                                                                                             | Yes <input type="checkbox"/> No <input type="checkbox"/> Not known <input type="checkbox"/> |
| <b>10.4.</b> | CVP line                                                                                                                  | Yes <input type="checkbox"/> No <input type="checkbox"/> Not known <input type="checkbox"/> |
| <b>10.5.</b> | Cardiac monitoring                                                                                                        | Yes <input type="checkbox"/> No <input type="checkbox"/> Not known <input type="checkbox"/> |
| <b>10.6.</b> | CTG                                                                                                                       | Yes <input type="checkbox"/> No <input type="checkbox"/> Not known <input type="checkbox"/> |
| <b>10.7.</b> | Other                                                                                                                     | Yes <input type="checkbox"/> No <input type="checkbox"/> Not known <input type="checkbox"/> |
|              | (If yes) specify _____                                                                                                    |                                                                                             |
| <b>11.</b>   | <b>Did this woman receive an indwelling bladder catheter during labour/postpartum?</b>                                    |                                                                                             |
|              | Yes <input type="checkbox"/> No <input type="checkbox"/> Not known <input type="checkbox"/>                               |                                                                                             |
| <b>12.</b>   | <b>Did any of the following events/interventions occur during labour or delivery?</b>                                     |                                                                                             |
| <b>12.1.</b> | Oliguria (urine output <30ml/hour for > 2 hours)                                                                          | Yes <input type="checkbox"/> No <input type="checkbox"/> Not known <input type="checkbox"/> |
| <b>12.2.</b> | Severe hypertension (either BP ≥160 systolic or ≥110 diastolic (mmHg))                                                    | Yes <input type="checkbox"/> No <input type="checkbox"/> Not known <input type="checkbox"/> |
| <b>12.3.</b> | High potassium (≥6.0 mmol/L or requiring treatment)                                                                       | Yes <input type="checkbox"/> No <input type="checkbox"/> Not known <input type="checkbox"/> |
| <b>12.4.</b> | Low blood pressure <90 mmHg                                                                                               | Yes <input type="checkbox"/> No <input type="checkbox"/> Not known <input type="checkbox"/> |
|              | (If yes) Fluid resuscitation only                                                                                         | Yes <input type="checkbox"/> No <input type="checkbox"/> Not known <input type="checkbox"/> |
|              | Inotropes                                                                                                                 | Yes <input type="checkbox"/> No <input type="checkbox"/> Not known <input type="checkbox"/> |
| <b>12.5.</b> | Blood/platelet transfusion                                                                                                | Yes <input type="checkbox"/> No <input type="checkbox"/> Not known <input type="checkbox"/> |
|              | (If yes) Number of units _____ (RBC/platelets)                                                                            |                                                                                             |



**SECTION 5**

|              |                                                                                                         |                                                                                             |  |
|--------------|---------------------------------------------------------------------------------------------------------|---------------------------------------------------------------------------------------------|--|
| <b>13.</b>   | <b>Did any of the following events/interventions occur post-partum prior to discharge?</b>              |                                                                                             |  |
| <b>13.1.</b> | Oliguria (urine output <30ml/hour for > 2 hours)                                                        | Yes <input type="checkbox"/> No <input type="checkbox"/> Not known <input type="checkbox"/> |  |
| <b>13.2.</b> | Severe hypertension (either BP ≥160 systolic or ≥110 diastolic (mmHg))                                  | Yes <input type="checkbox"/> No <input type="checkbox"/> Not known <input type="checkbox"/> |  |
| <b>13.3.</b> | High potassium (≥6.0 mmol/L or requiring treatment)                                                     | Yes <input type="checkbox"/> No <input type="checkbox"/> Not known <input type="checkbox"/> |  |
| <b>13.4.</b> | Low blood pressure <90 mmHg                                                                             | Yes <input type="checkbox"/> No <input type="checkbox"/> Not known <input type="checkbox"/> |  |
|              | (If yes) Fluid resuscitation only                                                                       | Yes <input type="checkbox"/> No <input type="checkbox"/> Not known <input type="checkbox"/> |  |
|              | Inotropes                                                                                               | Yes <input type="checkbox"/> No <input type="checkbox"/> Not known <input type="checkbox"/> |  |
| <b>13.5.</b> | Blood/platelet transfusion                                                                              | Yes <input type="checkbox"/> No <input type="checkbox"/> Not known <input type="checkbox"/> |  |
|              | (If yes) Number of units _____ (RBC/platelets)                                                          |                                                                                             |  |
| <b>14.</b>   | <b>Did this woman receive non-steroidal anti-inflammatory medication postpartum prior to discharge?</b> |                                                                                             |  |
|              | Yes <input type="checkbox"/> No <input type="checkbox"/> Not known <input type="checkbox"/>             |                                                                                             |  |
|              | (If yes) Name of agent _____                                                                            | Indication _____                                                                            |  |
| <b>15.</b>   | <b>Was there a plan for follow up with the following medical providers?</b>                             |                                                                                             |  |
| <b>15.1.</b> | GP                                                                                                      | Yes <input type="checkbox"/> No <input type="checkbox"/> Not known <input type="checkbox"/> |  |
| <b>15.2.</b> | High-risk clinic                                                                                        | Yes <input type="checkbox"/> No <input type="checkbox"/> Not known <input type="checkbox"/> |  |
| <b>15.3.</b> | Nephrologist                                                                                            | Yes <input type="checkbox"/> No <input type="checkbox"/> Not known <input type="checkbox"/> |  |
| <b>15.4.</b> | Other                                                                                                   | Yes <input type="checkbox"/> No <input type="checkbox"/> Not known <input type="checkbox"/> |  |
| <b>16.</b>   | <b>Is there any other relevant information regarding this patient? Please provide details.</b>          |                                                                                             |  |
|              | _____                                                                                                   |                                                                                             |  |
|              | _____                                                                                                   |                                                                                             |  |
|              | _____                                                                                                   |                                                                                             |  |
|              | _____                                                                                                   |                                                                                             |  |
|              | _____                                                                                                   |                                                                                             |  |
|              | _____                                                                                                   |                                                                                             |  |
|              | _____                                                                                                   |                                                                                             |  |
|              | _____                                                                                                   |                                                                                             |  |
|              | _____                                                                                                   |                                                                                             |  |
|              | _____                                                                                                   |                                                                                             |  |

End of Survey. Thank you!
